# Supplementary material
Source: Springer Nature journal article supplement (https://www.springermedizin.de/resource/supplementary/12890_2013_401_MOESM1_ESM.pdf/9505130)
Supplement: MOESM1 [file 9505130]

# Odds Ratio 95% CI

Study name

n

OR (95% CI)

Weight (%)

Gotfried study 1 [8]

300

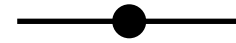

2.015 (1.260, 3.221)

49.6

Gotfried study 2 [8]

297

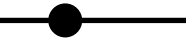

1.582 (0.993, 2.520)

50.4

Overall

597

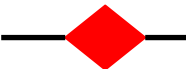

1.784 (1.282, 2.482)

100

0.1

1

10

Favor placebo

Favor indacaterol
